# Supplementary material for: Cerebrospinal fluid B cells and disease progression in multiple sclerosis - A longitudinal prospective study
Source: PubMed Central journal article supplement (PMC5544180; doi:10.1371/journal.pone.0182462), 2017-08-04
Supplement: pone.0182462.s001.pdf [file pone.0182462.s001.pdf]

1 **PONE-D-17-15170**

2 **Cerebrospinal fluid B cells and disease progression in multiple sclerosis - A longitudinal prospective**  
3 **study**

4 **Supporting Information**

5 **Supplementary Table**

6

7

8 **S1 Table. Differences in lymphocyte populations and cerebrospinal fluid parameters between patients with other inflammatory and**  
 9 **noninflammatory neurological diseases.**

|                                             | <b>Other<br/>inflammatory<br/>neurological diseases</b> | <b>Other non-<br/>inflammatory<br/>neurological diseases</b> | <b>P-value<br/>Univariate<br/>analysis</b> | <b>P-value<br/>Multivariate<br/>analysis</b> |
|---------------------------------------------|---------------------------------------------------------|--------------------------------------------------------------|--------------------------------------------|----------------------------------------------|
| Number of patients                          | 10                                                      | 30                                                           |                                            |                                              |
| Females                                     | 6 (60%)                                                 | 20 (67%)                                                     | 0.718 <sup>1</sup>                         |                                              |
| Age at sampling (years) <sup>1</sup>        | 34.7 (33.4, 46.1)                                       | 39.4 (33.6, 45.3)                                            | 0.420 <sup>2</sup>                         |                                              |
| CSF leukocytes / $\mu\text{l}$ <sup>1</sup> | 44.4 (0.0, 97.6)                                        | 2.7 (0.9, 4.6)                                               | 0.002 <sup>3</sup>                         |                                              |
| CSF IgG index <sup>1</sup>                  | 1.00 (0.54, 1.47)                                       | 0.51 (0.47, 0.55)                                            | <0.001 <sup>3</sup>                        |                                              |
| CSF albumin quotient <sup>1</sup>           | 5.78 (2.30, 9.25))                                      | 5.95 (4.65, 7.25)                                            | 0.905 <sup>3</sup>                         |                                              |
| CSF IgG oligoclonal bands                   | 3/9 (33%)                                               | 2/27 (7%)                                                    | 0.088 <sup>1</sup>                         |                                              |
| CSF CD3+ cells <sup>1</sup>                 | 92.5 (88.8, 96.2)                                       | 91.4 (89.1, 93.6)                                            | 0.655 <sup>3</sup>                         | 0.789 <sup>4</sup>                           |
| CSF CD19+CD138- cells (%) <sup>1</sup>      | 1.58 (0.81, 2.36)                                       | 0.73 (0.54, 0.92)                                            | 0.012 <sup>3</sup>                         | 0.219 <sup>4</sup>                           |
| CSF CD19+CD138+ cells (%) <sup>1</sup>      | 0.73 (0.09, 1.36)                                       | 0.29 (0.16, 0.42)                                            | 0.082 <sup>3</sup>                         | 0.198 <sup>4</sup>                           |
| CSF CD19-CD138+ cells (%) <sup>1</sup>      | 0.55 (0.04, 1.15)                                       | 0.15 (0.09, 0.21)                                            | 0.004 <sup>3</sup>                         | 0.099 <sup>4</sup>                           |
| CSF CD3-CD19-CD138- cells (%) <sup>1</sup>  | 4.67 (1.96, 7.37)                                       | 7.39 (4.94, 9.84)                                            | 0.104 <sup>3</sup>                         | 0.709 <sup>4</sup>                           |

10 <sup>1</sup> means with 95% confidence intervals. For the univariate analysis groups were compared using <sup>1</sup> Fisher's exact test and <sup>2</sup> independent  
11 samples Student's t-test and <sup>3</sup> independent samples Student's t-test with log-transformed data. <sup>4</sup> log-transformed data were compared using  
12 multivariate 2-way ANOVA with sex, age and CSF leukocyte cell numbers as covariates, exclude confounders.

13

14
