# Supplementary material for: Cerebrospinal fluid B cells and disease progression in multiple sclerosis - A longitudinal prospective study
Source: PubMed Central journal article supplement (PMC5544180; doi:10.1371/journal.pone.0182462), 2017-08-04
Supplement: pone.0182462.s002.pdf [file pone.0182462.s002.pdf]

1 **PONE-D-17-15170**

2 **Cerebrospinal fluid B cells and disease progression in multiple sclerosis - A longitudinal prospective**  
3 **study**

4 **Supporting Information**

5 **Supplementary Table**

6

7

8 **S2 Table. Correlation of age at sampling with CSF parameters.**

| Age at sampling versus        | Pearson's correlation |                 |           |         | Spearman's correlation |                |         |
|-------------------------------|-----------------------|-----------------|-----------|---------|------------------------|----------------|---------|
|                               | R                     | 95% CI          | R squared | P-value | Rho                    | 95% CI         | P-value |
| CSF leukocytes / $\mu$ l      | 0.044                 | -0.146, 0.231   | 0.002     | 0.649   | -0.228                 | -0.404, -0.035 | 0.018   |
| CSF erythrocytes / $\mu$ l    | -0.117                | -0.299, 0.074   | 0.013     | 0.229   | 0.023                  | -0.173, 0.216  | 0.816   |
| IgG index                     | -0.221                | -0.396, -0.032  | 0.049     | 0.022   | -0.247                 | -0.423, -0.054 | 0.011   |
| Albumin quotient              | 0.453                 | 0.288, 0.592    | 0.205     | <0.0001 | 0.393                  | 0.214, 0.547   | <0.0001 |
| CSF CD3+ cells (%)            | 0.068                 | -0.123, 0.253   | 0.005     | 0.487   | 0.084                  | -0.112, 0.274  | 0.386   |
| CSF CD19+CD138- cells (%)     | -0.212                | -0.386, -0.0249 | 0.045     | 0.027   | -0.184                 | -0.365, 0.011  | 0.056   |
| CSF CD19+CD138+ cells (%)     | -0.191                | -0.367, -0.003  | 0.037     | 0.047   | -0.145                 | -0.330, 0.051  | 0.134   |
| CSF CD19-CD138+ cells (%)     | -0.242                | -0.413, -0.056  | 0.059     | 0.011   | -0.248                 | -0.422, -0.056 | 0.010   |
| CSF CD3-CD19-CD138- cells (%) | 0.095                 | -0.095, 0.279   | 0.009     | 0.326   | 0.128                  | -0.068, 0.315  | 0.186   |

9
