# Supplementary material for: Cerebrospinal fluid B cells and disease progression in multiple sclerosis - A longitudinal prospective study
Source: PubMed Central journal article supplement (PMC5544180; doi:10.1371/journal.pone.0182462), 2017-08-04
Supplement: pone.0182462.s003.pdf [file pone.0182462.s003.pdf]

1 **PONE-D-17-15170**

2 **Cerebrospinal fluid B cells and disease progression in multiple sclerosis - A longitudinal prospective**  
3 **study**

4 **Supporting Information**

5 **Supplementary Table**

6 **S3 Table. Correlation of age at sampling with CSF parameters within MS subgroups.**

| Age at sampling versus        | Pearson's correlation R |        | Spearman's correlation R |        |
|-------------------------------|-------------------------|--------|--------------------------|--------|
|                               | Bout-onset MS           | PPMS   | Bout-onset MS            | PPMS   |
| Number of cases               | 59                      | 9      | 59                       | 9      |
| CSF leukocytes / $\mu$ l      | -,310*                  | -0,207 | -,369**                  | -0,150 |
| CSF erythrocytes / $\mu$ l    | -0,146                  | -0,318 | 0,046                    | -0,070 |
| IgG index                     | -0,126                  | -0,511 | -0,088                   | -0,600 |
| Albumin quotient              | 0,273                   | 0,208  | 0,208                    | 0,600  |
| CSF CD3+ cells (%)            | 0,007                   | -0,379 | 0,034                    | -0,633 |
| CSF CD19+CD138- cells (%)     | -0,116                  | 0,401  | -0,087                   | 0,483  |
| CSF CD19+CD138+ cells (%)     | -0,043                  | -0,052 | 0,068                    | -0,117 |
| CSF CD19-CD138+ cells (%)     | -0,117                  | 0,067  | -0,148                   | 0,686  |
| CSF CD3-CD19-CD138- cells (%) | 0,079                   | 0,296  | -0,010                   | 0,567  |

7

8 \* correlation is significant at the 0.05 level (2-tailed, corrected for 2 comparisons), \*\* correlation is significant at the 0.01 level (2-tailed,

9 corrected for 2 comparisons).
