# Supplementary material for: Cerebrospinal fluid B cells and disease progression in multiple sclerosis - A longitudinal prospective study
Source: PubMed Central journal article supplement (PMC5544180; doi:10.1371/journal.pone.0182462), 2017-08-04
Supplement: pone.0182462.s004.pdf [file pone.0182462.s004.pdf]

1 **PONE-D-17-15170**

2 **Cerebrospinal fluid B cells and disease progression in multiple sclerosis - A longitudinal prospective**  
3 **study**

4 **Supporting Information**

5 **Supplementary Figure**

6

7 S1 Fig. Differences in the ratio of CD19+CD138+ / CD19+CD138- lymphocyte populations between patients with with CIS, RRMS,  
8 SPMS, PPMS and OND.

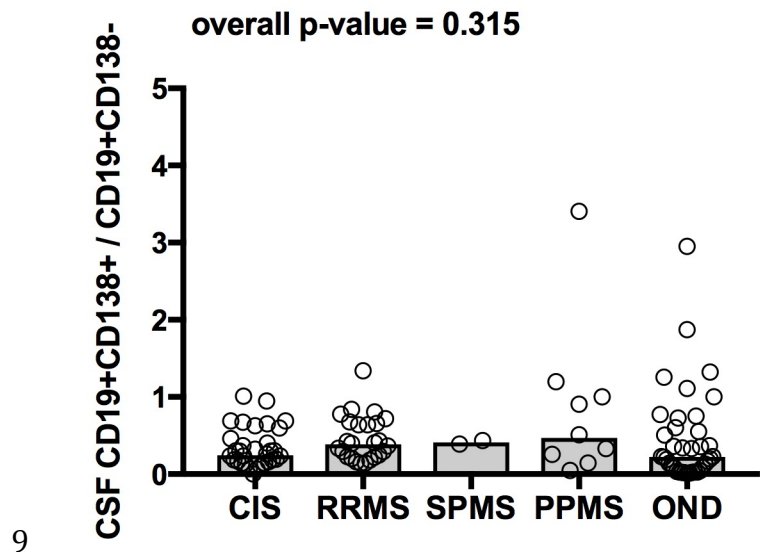

10 Individual data points are shown as open circles and means as grey bars. Log-transformed data were compared using univariate ANOVA with  
11 sex and age as covariates, exclude confounders. The overall p-value is indicated in the graph.
