# Supplementary material for: Cerebrospinal fluid B cells and disease progression in multiple sclerosis - A longitudinal prospective study
Source: PubMed Central journal article supplement (PMC5544180; doi:10.1371/journal.pone.0182462), 2017-08-04
Supplement: pone.0182462.s005.pdf [file pone.0182462.s005.pdf]

1 **PONE-D-17-15170**

2 **Cerebrospinal fluid B cells and disease progression in multiple sclerosis - A longitudinal prospective**  
3 **study**

4 **Supporting Information**

5 **Supplementary Figure**

6

7 S2 Fig. Differences in absolute numbers of lymphocyte populations between patients with CIS, RRMS, SPMS, PPMS and OND at  
8 sampling.

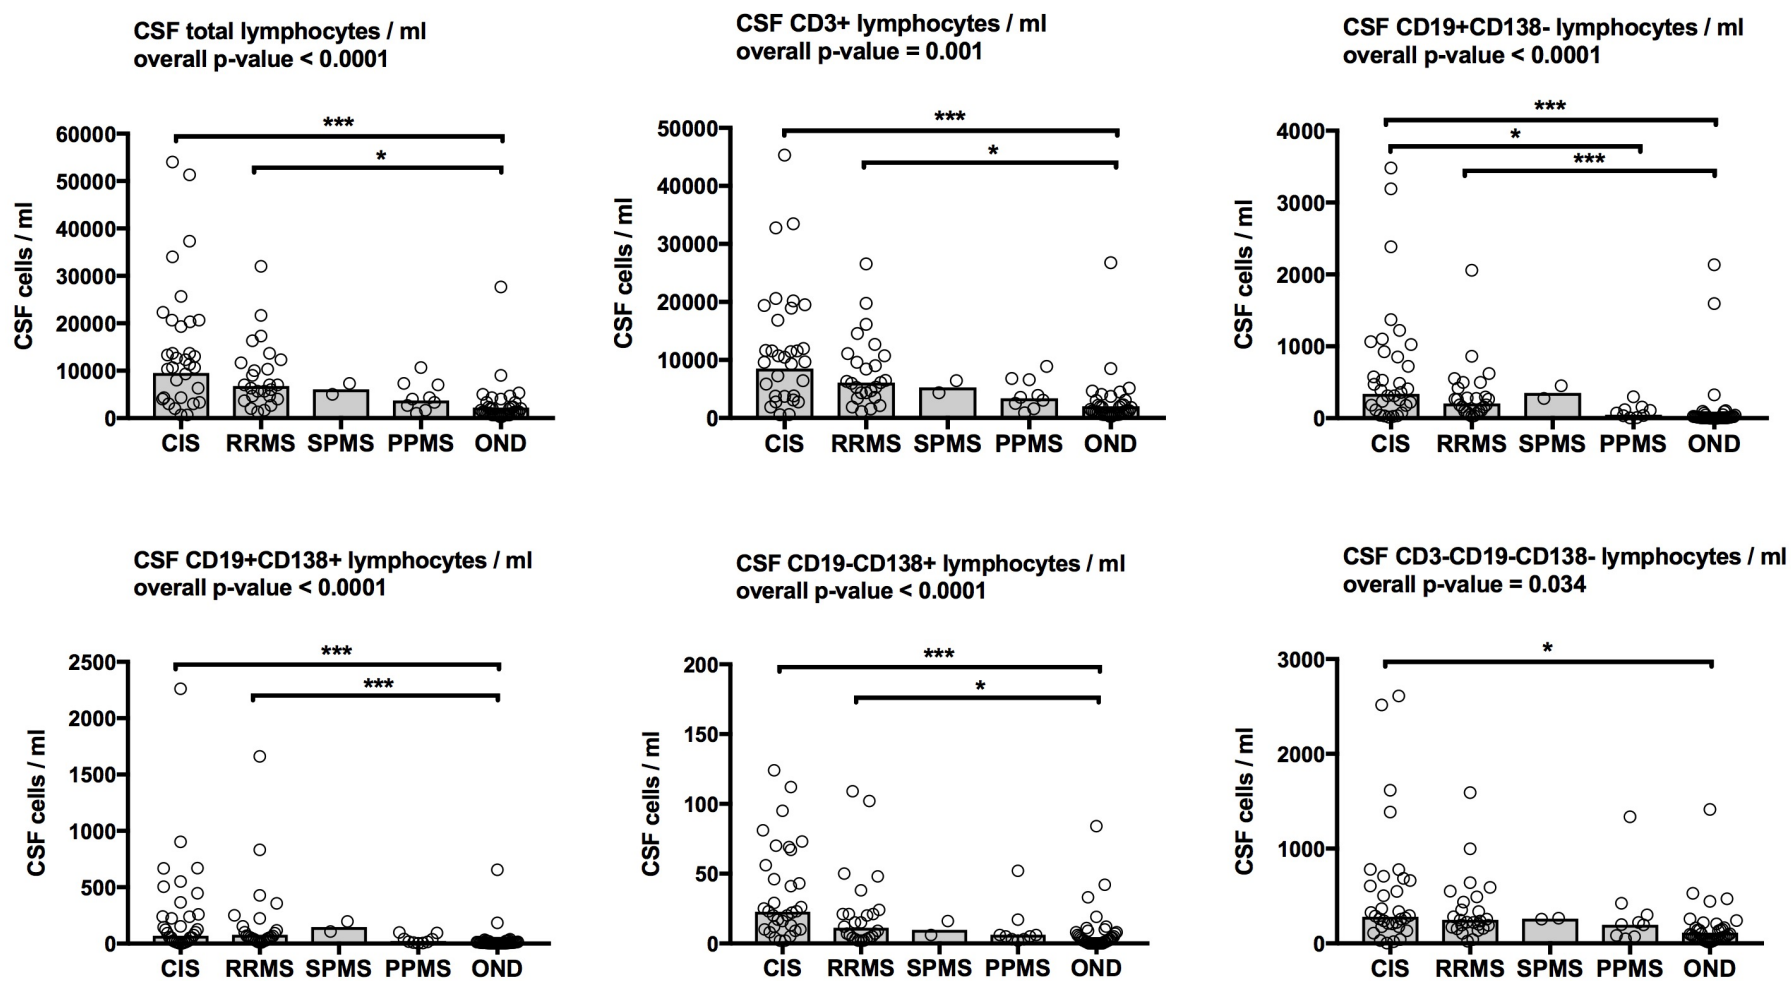

9

10

11 Individual data points are shown as open circles and means as grey bars. The total numbers of lymphocyte populations were calculated from  
12 total number of cerebrospinal fluid (CSF) leukocytes and the percentage of lymphocytes with CSF leukocytes. Log-transformed data were  
13 compared using multivariate 2-way ANOVA with sex and age as covariates, exclude confounders. The overall p-values are indicated in each  
14 graph and brackets indicate significant differences between groups at  $p < 0.05$  (\*) or  $p < 0.001$  (\*\*\*) as analyzed by Bonferroni's post-hoc test.
